# Supplementary material
Source: MDPI journal article supplement (https://www.mdpi.com/2072-4292/14/19/4719)
Supplement: s1 [file s1]

**Supplementary Materials for:**

**Enhanced understanding of groundwater storage changes under the influence of river basin governance using GRACE data and downscaling model**

Jianchong Sun<sup>1,2</sup>, Litang Hu<sup>1,2\*</sup>, Xin Liu<sup>3</sup>, Kangning Sun<sup>1,2</sup>

1. College of Water Sciences, Beijing Normal University, Beijing 100875, China.
2. Engineering Research Center of Groundwater Pollution Control and Remediation of Ministry of Education, Beijing Normal University, Beijing 100875, China.
3. Powerchina Huadong Engineering Corporation Limited, Hangzhou 311122, China.

\*Corresponding author:

Litang Hu: [litanghu@bnu.edu.cn](mailto:litanghu@bnu.edu.cn).

Other authors:

Jianchong Sun

Xin Liu

Kangning Sun

**Table S1** Parameter thresholds of the model.

| Parameter               | Lower value        | Upper value |
|-------------------------|--------------------|-------------|
| $T$ (m <sup>2</sup> /d) | 50000              | 5000000     |
| $T_a, T_b$              | 0.1                | 1           |
| $\mu$                   | $1 \times 10^{-3}$ | 0.1         |
| $\mu_a, \mu_b$          | 0.1                | 1           |
| $\alpha$                | 0.1                | 0.6         |
| $\alpha_a, \alpha_b$    | 0.1                | 0.8         |
| $\beta$                 | 0.1                | 0.6         |
| $\beta_a, \beta_b$      | 0.1                | 0.8         |
| $C_h$                   | 0.0001             | 0.03        |

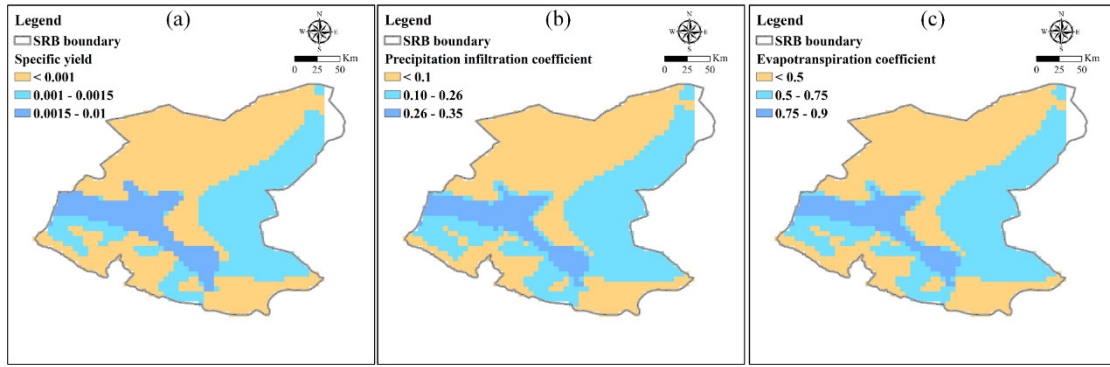

**Figure S1.** Spatial distribution of (a) comprehensive specific yield, (b) precipitation infiltration coefficients, and (c) evapotranspiration coefficient in the study area.

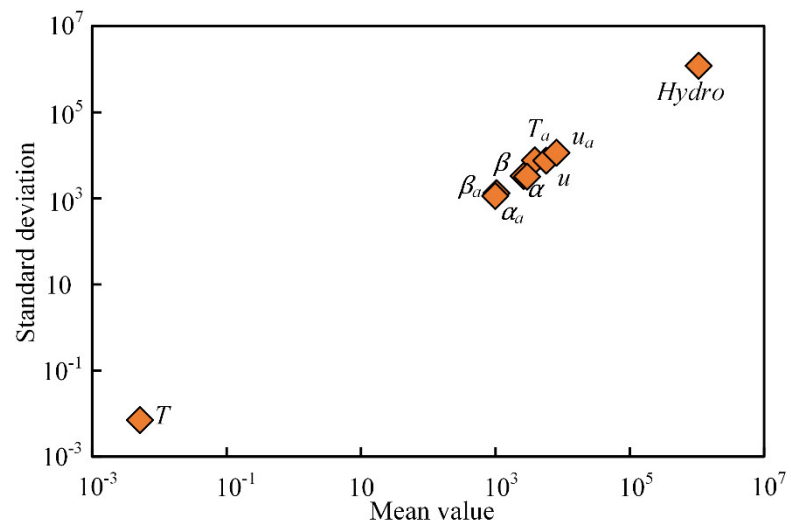

**Figure S2.** Sensitivities of model parameters.

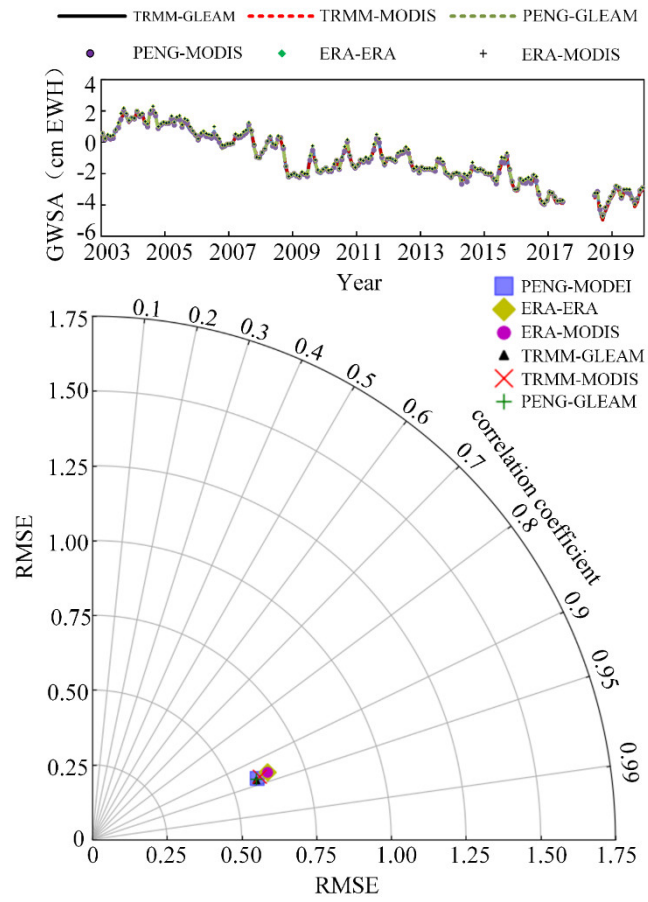

**Figure S3.** Effects of different forcing data combinations on simulated groundwater storage changes.
